# Supplementary material for: Combining statistical and hydrodynamic models to assess compound flood hazards from rainfall and storm surge: a case study of Shanghai
Source: Copernicus journal article supplement (doi:10.5194/hess-2023-261), 2023-11-16
Supplement: Supplementary file [file hess-2023-261-AC1-supplement.pdf]

## **Response to Reviewer #1's Comments and Suggestions**

*The presented study looks to assess compound flood hazards in Shanghai from rainfall and storm surge events using a statistical dependence model for compound event definition and a hydrodynamic model to represent inundation. The authors in particular look at the sensitivity of inundation to the timing of storm surge peaks and rainfall, which is valuable information for flood risk management. The study is well organized and the objectives are clearly defined and well addressed. I do have a number of relatively minor issues that should be addressed before the paper is published. Please find them below:*

*1. Add quantitative results to Abstract.*

**Response:** We appreciate your suggestion. We have revised the Abstract to include quantitative findings. For example, “More specifically, that the peak rainfall occurs two hours before the peak storm surge would cause the deepest average cumulative inundation depth.”

*2. “TC” events, tropical cyclone acronym should be spelt out the first time*

**Response:** We spelled out the "tropical cyclone (TC)" when it appears in the second paragraph of introduction for first time.

*3. Paragraph starting line 67 is missing some references. The example provided line 71, are the authors saying this is something that can happen in theory, or that has been documented to happen in the case study area (reference?).*

**Response:** We added relevant references (Hao et al., 2016; Jalili et al., 2022) for paragraph starting at line 67 and appropriate references (Feng et al., 2022) to support the example provided in line 71.

References:

Hao Z., and Singh VP.: Review of dependence modeling in hydrology and water resources. *Progress in Physical Geography*, 40(4):549-78, doi:10.1177/030913331663246, 2016. Jalili Pirani, F., and Najafi, M. R.: Multivariate analysis of compound flood hazard across Canada's Atlantic, Pacific and Great Lakes coastal areas. *Earth's Future*, 10(8), e2022EF002655, doi:10.1029/2022EF002655, 2022. Feng, D., Tan, Z., Engwirda, D., Liao, C., Xu, D., Bisht, G., Zhou, T., Li, H.-Y., and Leung, L. R.: Investigating coastal backwater effects and flooding in the coastal zone using a global river transport model on an unstructured mesh, *Hydrol. Earth Syst. Sci.*, 26, 5473–5491, <https://doi.org/10.5194/hess-26-5473-2022>, 2022.

*4. Line 135. A little more detail on what is meant by a “local typical storm surge pattern and rainfall hyetograph” would be beneficial. What is a typical storm and how is it defined?*

**Response:** We provided additional details to explain the concept of a "local typical storm surge pattern and rainfall hyetograph," which refers to historical patterns

observed in the Shanghai region. This pattern is characterized based on past storm events, notably during the "9711" typhoon event in August 1997. During this event, the sea level rose significantly, causing high tide levels in the Huangpu River to break historical records. At the Mishidu and Damaogang stations, both located upriver from Shanghai, water levels were 24 cm and 26 cm higher than their previous historical records, respectively. The peak tide occurred just after the heaviest rainfall.

*5. a follow up remark is that total sea level during a surge is referred to as "storm surge" in the paper, including in the result figures. How are tides considered in this study? Is the surge residual set at high tide?*

**Response:** Thank you for pointing this out. We have clarified that the total sea level during a surge, referred to as "storm surge" in the paper and shown in the result figures, includes the tidal component. The storm surge residual is set at high tide to represent the worst-case scenario. If the reference is mean high water instead of mean sea level, the length of the tide part bars may be smaller. However, we think that the peak water level, driven by the combination of astronomical tide, storm surge, and relative sea level rise, poses the most significant hazard to coastal cities.

*6. Bilskie and Hagen (2018) defines zones as "coastal", "hydrologic" and "transition". The use of the term "fluvial" here to refer to surge-induced only might be misleading as fluvial flooding in its typical definition can be rainfall-induced. Unless a clearer explanation is provided, "Tidal zone" or "coastal zone" might be more accurate. Jumping forward, the Bilskie and Hagen terminology is used in Figure 7 so there needs to be consistency on this throughout the paper.*

**Response:** Thank you for your suggestion. In this study, we focus on the water level changes at the outlet of the Huangpu River (Wusongkou tide gauge), without considering the coastal region over the sea. Initially, we used the term "fluvial" to refer to surge-induced flooding. To avoid any confusion, we clarify in the article that "fluvial" in this context does not refer to rainfall-induced flooding, but rather to the water level changes caused by storm surges. We have updated Figure 7 to use "fluvial zones" and "pluvial zones" instead of "coastal zones" and "hydrologic zone".

*7. How was the hydrodynamic model calibrated and validated? I could not find Ke et al. (2021) in the references.*

**Response:** We apologize for the oversight. The overland flood model covers the mainland of Shanghai city with triangular cells of typical dimension 150 m and curvilinear grid cells cover the Huangpu River and other major canals. In the revision, we provided additional information about the hydrodynamic model and added Ke et al. (2021) in the references.

Refereces:

Ke, Q., Yin, J., Bricker, J., Savage, N., Buonomo, E., Ye, Q., Visser, P., Dong, G., Wang, S., Tian, Z. and Sun, L.: An integrated framework of coastal flood modelling under the failures of sea dikes: a case study in Shanghai. *Nat. Hazards*, 109(1),

671-703, doi:10.1007/s11069-021-04853-z, 2021.

8. *Figure 6 b and d, add scale and north arrow.*

**Response:** Thank you for this suggestion, we added the scale and a north arrow to Figure 6(b) and (d).

9. *Line 229: “represented by red” in Figure 7?*

**Response:** Thank you for pointing out this unclear sentence. We changed this part as follows: “In general, storm surges are the primary cause of inundation along and within the Huangpu River, as indicated by the areas marked in red in Figure 7. The inland areas situated far from the river experience inundation primarily due to rainfall, shown in blue. Distinct transitional zones, marked in yellow in Figure 7, can be seen surrounding the Huangpu River.”

10. *While the discussions provide insights on the study’s limitations and its wider implications on flood mitigation, there is a lack of references to past studies that have looked at flooding risk in Shanghai and how the author’s findings relate to them.*

**Response:** We added four additional references to three previous studies related to flooding risk in Shanghai in the discussion section and improved the links between our findings and the existing literature.
